# Supplementary material for: Green Extraction of Forsythoside A, Phillyrin and Phillygenol from Forsythia suspensa Leaves Using a β-Cyclodextrin-Assisted Method
Source: MDPI journal article supplement (doi:10.3390/molecules27207055), 2022-10-19
Supplement: s1 [file s1]

## **Supplementary Material**

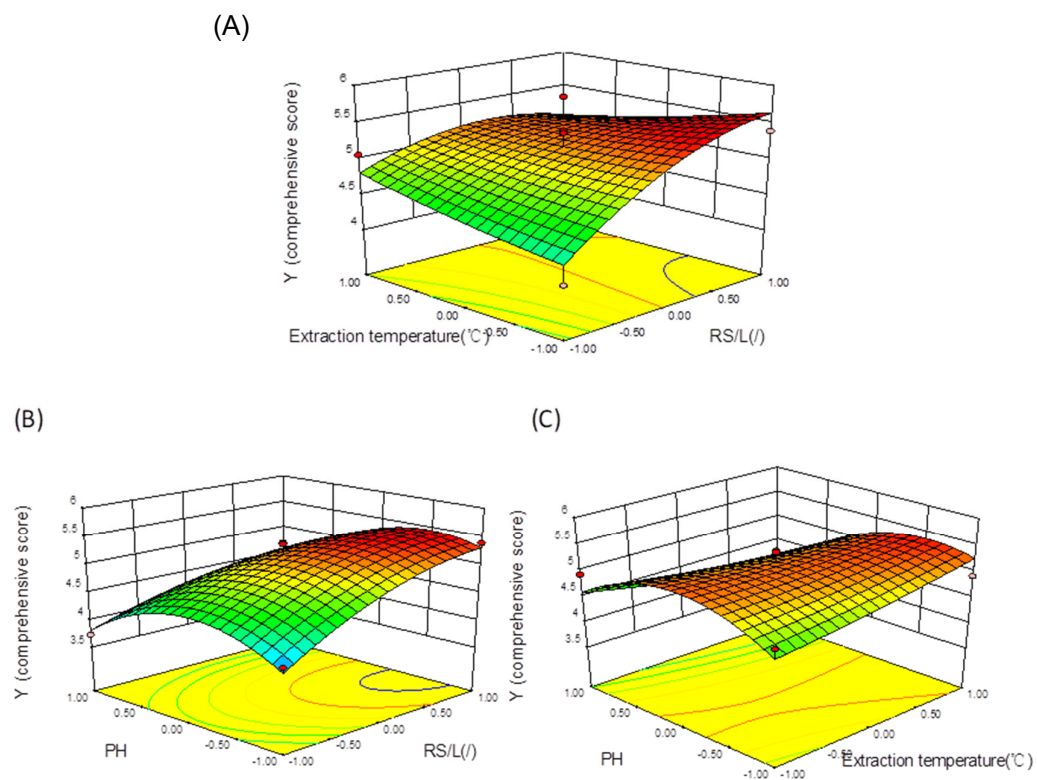

**Figure S1.** Three-dimensional response surface graphs of the influences of variables on Y(comprehensive score): (A) interaction of Extraction temperature and  $R_{SL}$ ; (B) interaction of pH and  $R_{SL}$ ; (C) interaction of pH and Extraction temperature.

**Table S1.** BBD and the response values of Y (comprehensive score) from *Forsythia suspensa* leaves.

| Run | Independent variables |                            |                |                        | Extraction yield (%) |           |             | Y    |
|-----|-----------------------|----------------------------|----------------|------------------------|----------------------|-----------|-------------|------|
|     | X <sub>1</sub>        | X <sub>2</sub>             | X <sub>3</sub> | X <sub>4</sub>         | Forsythin A          | Phillyrin | Phillygenol |      |
|     | R <sub>S/L</sub> (/)  | Extraction temperature(°C) | pH             | R <sub>β/F</sub> (g/g) |                      |           |             |      |
| 1   | 1:40(1)               | 55(-1)                     | 3(0)           | 4:5(0)                 | 11.89                | 5.48      | 0.31        | 6.49 |
| 2   | 1:40(1)               | 70(0)                      | 3(0)           | 3:5(-1)                | 11.92                | 5.40      | 0.31        | 6.48 |
| 3   | 1:40(1)               | 70(0)                      | 1(-1)          | 4:5(0)                 | 10.60                | 4.91      | 0.35        | 5.82 |
| 4   | 1:30(0)               | 70(0)                      | 5(1)           | 3:5(-1)                | 10.89                | 5.30      | 0.31        | 6.04 |
| 5   | 1:30(0)               | 85(1)                      | 3(0)           | 5:5(1)                 | 11.38                | 5.23      | 0.33        | 6.22 |
| 6   | 1:20(-1)              | 85(1)                      | 3(0)           | 4:5(0)                 | 9.55                 | 4.89      | 0.32        | 5.38 |
| 7   | 1:20(-1)              | 70(0)                      | 3(0)           | 5:5(1)                 | 8.80                 | 4.97      | 0.33        | 5.11 |
| 8   | 1:20(-1)              | 70(0)                      | 3(0)           | 3:5(-1)                | 9.31                 | 4.91      | 0.30        | 5.29 |
| 9*  | 1:30(0)               | 70(0)                      | 3(0)           | 4:5(0)                 | 11.81                | 5.40      | 0.32        | 6.44 |

|     |          |        |       |         |       |      |      |      |
|-----|----------|--------|-------|---------|-------|------|------|------|
| 10* | 1:30(0)  | 70(0)  | 3(0)  | 4:5(0)  | 11.57 | 5.25 | 0.31 | 6.30 |
| 11  | 1:30(0)  | 85(1)  | 3(0)  | 3:5(-1) | 11.71 | 5.36 | 0.32 | 6.39 |
| 12  | 1:20(-1) | 70(0)  | 1(-1) | 4:5(0)  | 8.62  | 3.95 | 0.31 | 4.73 |
| 13  | 1:30(0)  | 85(1)  | 1(-1) | 4:5(0)  | 8.47  | 2.72 | 1.38 | 4.62 |
| 14  | 1:30(0)  | 85(1)  | 5(1)  | 4:5(0)  | 11.36 | 5.56 | 0.33 | 6.31 |
| 15  | 1:30(0)  | 55(-1) | 3(0)  | 3:5(-1) | 11.61 | 5.37 | 0.31 | 6.35 |
| 16* | 1:30(0)  | 70(0)  | 3(0)  | 4:5(0)  | 11.52 | 5.28 | 0.31 | 6.29 |
| 17  | 1:30(0)  | 70(0)  | 1(-1) | 5:5(1)  | 9.81  | 4.35 | 0.70 | 5.44 |
| 18  | 1:20(-1) | 55(-1) | 3(0)  | 4:5(0)  | 11.73 | 4.83 | 0.31 | 6.23 |
| 19  | 1:40(1)  | 70(0)  | 5(1)  | 4:5(0)  | 10.96 | 5.44 | 0.30 | 6.10 |
| 20  | 1:30(0)  | 55(-1) | 1(-1) | 4:5(0)  | 11.69 | 5.39 | 0.34 | 6.40 |
| 21  | 1:30(0)  | 70(0)  | 1(-1) | 3:5(-1) | 10.29 | 4.77 | 0.46 | 5.69 |
| 22  | 1:40(1)  | 85(1)  | 3(0)  | 4:5(0)  | 12.15 | 5.60 | 0.33 | 6.64 |

|     |          |        |      |        |       |      |      |      |
|-----|----------|--------|------|--------|-------|------|------|------|
| 23* | 1:30(0)  | 70(0)  | 3(0) | 4:5(0) | 11.86 | 5.51 | 0.32 | 6.50 |
| 24  | 1:20(-1) | 70(0)  | 5(1) | 4:5(0) | 9.08  | 5.25 | 0.33 | 5.30 |
| 25  | 1:30(0)  | 55(-1) | 5(1) | 4:5(0) | 11.45 | 5.63 | 0.33 | 6.37 |
| 26* | 1:30(0)  | 70(0)  | 3(0) | 4:5(0) | 12.08 | 5.51 | 0.32 | 6.58 |
| 27  | 1:30(0)  | 55(-1) | 3(0) | 5:5(1) | 10.41 | 5.51 | 0.33 | 5.91 |
| 28  | 1:40(1)  | 70(0)  | 3(0) | 5:5(1) | 11.96 | 5.45 | 0.32 | 6.51 |
| 29  | 1:30(0)  | 70(0)  | 5(1) | 5:5(1) | 9.93  | 5.61 | 0.33 | 5.75 |

\* Indicated 5 center points

**Table S2.** Analysis of variance (ANOVA) for the developed second order polynomial models.

| Source                        | Sum of squares | df | Mean square | F-value          | P-value  |    |
|-------------------------------|----------------|----|-------------|------------------|----------|----|
| Model                         | 8.05           | 14 | 0.58        | 7.81             | 0.0002   | ** |
| X <sub>1</sub>                | 3              | 1  | 3           | 40.71            | < 0.0001 | ** |
| X <sub>2</sub>                | 0.4            | 1  | 0.4         | 5.43             | 0.0353   | *  |
| X <sub>3</sub>                | 0.86           | 1  | 0.86        | 11.62            | 0.0042   | ** |
| X <sub>4</sub>                | 0.14           | 1  | 0.14        | 1.88             | 0.1921   |    |
| X <sub>1</sub> X <sub>2</sub> | 0.25           | 1  | 0.25        | 3.37             | 0.0877   |    |
| X <sub>1</sub> X <sub>3</sub> | 0.021          | 1  | 0.021       | 0.2 <sup>9</sup> | 0.6017   |    |
| X <sub>1</sub> X <sub>4</sub> | 0.011          | 1  | 0.011       | 0.15             | 0.7045   |    |
| X <sub>2</sub> X <sub>3</sub> | 0.74           | 1  | 0.74        | 10.05            | 0.0068   | ** |
| X <sub>2</sub> X <sub>4</sub> | 0.018          | 1  | 0.018       | 0.25             | 0.6264   |    |
| X <sub>3</sub> X <sub>4</sub> | 3.25E-04       | 1  | 3.25E-04    | 4.41E-03         | 0.948    |    |

|                             |       |    |       |       |        |    |
|-----------------------------|-------|----|-------|-------|--------|----|
| X <sub>1</sub> <sup>2</sup> | 0.78  | 1  | 0.78  | 10.61 | 0.0057 | ** |
| X <sub>2</sub> <sup>2</sup> | 0.02  | 1  | 0.02  | 0.27  | 0.6091 |    |
| X <sub>3</sub> <sup>2</sup> | 1.88  | 1  | 1.88  | 25.55 | 0.0002 | ** |
| X <sub>4</sub> <sup>2</sup> | 0.29  | 1  | 0.29  | 3.95  | 0.0668 |    |
| Residual                    | 1.03  | 14 | 0.074 |       |        |    |
| Lack of Fit                 | 0.97  | 10 | 0.097 | 5.96  | 0.0501 |    |
| Pure Error                  | 0.065 | 4  | 0.016 |       |        |    |
| Cor Total                   | 9.08  | 28 |       |       |        |    |

---

Note: \* represents significant difference in results ( $p < 0.05$ ), \*\* represents extremely significant difference in results ( $p < 0.01$ ).

**Table S3.** BBD and the response values of Y (comprehensive score) from pure water extraction *Forsythia suspensa* leaf.

| Run | Independent variables |                            |                | Extraction yield (%) |           |             | Y     |
|-----|-----------------------|----------------------------|----------------|----------------------|-----------|-------------|-------|
|     | X <sub>1</sub>        | X <sub>2</sub>             | X <sub>3</sub> | Forsythin A          | Phillyrin | Phillygenol |       |
|     | R <sub>S/L</sub> (/)  | Extraction temperature(°C) | pH             |                      |           |             |       |
| 1*  | 1:20(0)               | 70(0)                      | 5(0)           | 11.01                | 3.25      | 0.18        | 5.39  |
| 2   | 1:30(1)               | 55(-1)                     | 5(0)           | 10.78                | 3.45      | 0.13        | 5.38  |
| 3   | 1:30(1)               | 70(0)                      | 3(-1)          | 10.90                | 3.29      | 0.11        | 5.384 |
| 4   | 1:10(-1)              | 55(-1)                     | 5(0)           | 9.33                 | 1.07      | 0.02        | 4.06  |
| 5   | 1:20(0)               | 85(1)                      | 3(-1)          | 10.45                | 2.39      | 0.05        | 4.91  |
| 6*  | 1:20(0)               | 70(0)                      | 5(0)           | 10.29                | 3.16      | 0.03        | 5.07  |
| 7   | 1:20(0)               | 55(-1)                     | 7(1)           | 8.61                 | 3.78      | 0.17        | 4.93  |
| 8   | 1:10(-1)              | 70(0)                      | 7(1)           | 8.20                 | 1.51      | 0.003       | 3.73  |
| 9*  | 1:20(0)               | 70(0)                      | 5(0)           | 10.84                | 2.35      | 0.024       | 5.05  |



|     |          |        |       |       |      |       |      |
|-----|----------|--------|-------|-------|------|-------|------|
| 10  | 1:30(1)  | 70(0)  | 7(1)  | 7.58  | 3.18 | 0.09  | 4.01 |
| 11* | 1:20(0)  | 70(0)  | 5(0)  | 10.85 | 2.19 | 0.02  | 5.00 |
| 12  | 1:10(-1) | 70(0)  | 3(-1) | 9.49  | 1.13 | 0.002 | 4.13 |
| 13* | 1:20(0)  | 70(0)  | 5(0)  | 10.88 | 3.18 | 0.05  | 5.36 |
| 14  | 1:20(0)  | 85(1)  | 7(1)  | 7.00  | 3.13 | 0.06  | 3.76 |
| 15  | 1:30(1)  | 85(1)  | 5(0)  | 10.35 | 3.86 | 0.10  | 5.32 |
| 16  | 1:10(-1) | 85(1)  | 5(0)  | 10.51 | 2.79 | 0.06  | 5.06 |
| 17  | 1:20(0)  | 55(-1) | 3(-1) | 10.51 | 2.15 | 0.06  | 4.87 |

---

\* Indicated 5 center points

**Table.S4** Analysis of variance (ANOVA) for the developed second order polynomial models on pure water extraction *Forsythia suspensa* leaf.

| Source                        | Sum of squares | df | Mean square | F-value | P-value |    |
|-------------------------------|----------------|----|-------------|---------|---------|----|
| Model                         | 5              | 9  | 0.56        | 5.4     | 0.0185  | *  |
| X <sub>1</sub>                | 1.22           | 1  | 1.22        | 11.8    | 0.0109  | *  |
| X <sub>2</sub>                | 4.48E-03       | 1  | 4.48E-03    | 0.044   | 0.8407  |    |
| X <sub>3</sub>                | 1.03           | 1  | 1.03        | 9.97    | 0.016   | *  |
| X <sub>1</sub> X <sub>2</sub> | 0.28           | 1  | 0.28        | 2.69    | 0.1447  |    |
| X <sub>1</sub> X <sub>3</sub> | 0.23           | 1  | 0.23        | 2.25    | 0.1769  |    |
| X <sub>2</sub> X <sub>3</sub> | 0.37           | 1  | 0.37        | 3.61    | 0.0993  |    |
| X <sub>1</sub> <sup>2</sup>   | 0.28           | 1  | 0.28        | 2.76    | 0.1405  |    |
| X <sub>2</sub> <sup>2</sup>   | 7.25E-03       | 1  | 7.25E-03    | 0.07    | 0.7985  |    |
| X <sub>3</sub> <sup>2</sup>   | 1.52           | 1  | 1.52        | 14.71   | 0.0064  | ** |
| Residual                      | 0.72           | 7  | 0.1         |         |         |    |

|             |      |    |       |      |        |
|-------------|------|----|-------|------|--------|
| Lack of Fit | 0.59 | 3  | 0.2   | 5.76 | 0.0619 |
| Pure Error  | 0.14 | 4  | 0.034 |      |        |
| Cor Total   | 5.72 | 16 |       |      |        |

---

Note: \* represents significant difference in results ( $p < 0.05$ ), \*\* represents extremely significant difference in results ( $p < 0.01$ ).
